# Supplementary material
Source: PubMed Central journal article supplement (PMC2824056)
Supplement: NIHMS168813-supplement-01.pdf [file NIHMS168813-supplement-01.pdf]

## SUPPLEMENTARY DATA

# Model-guided mutagenesis drives functional studies of human NHA2, implicated in hypertension

Maya Schushan<sup>‡</sup>, Minghui Xiang<sup>‡</sup>, Pavel Bogomiakov, Etana Padan, Rajini Rao\* and Nir Ben-Tal\*

‡These authors contributed equally to this work.

\*Corresponding authors

## SUPPLEMENTARY TEXT

### *Expression and Localization Analysis of NHA2 Mutants*

We assessed the membrane localization of the non-functional mutants detected in this study to investigate whether impaired functional phenotypes resulted from miss-localization or expression of the mutant proteins (Supplementary Figs. S4 and S5). Interestingly, all non-functional mutants showed expression and localization to the plasma membrane, suggesting that the impediments indeed resulted from interference of the protein's function and not from defects in its structural organization.

### *Additional MSAs produced for NHA2*

We conducted a three-iteration PSI-BLAST<sup>1</sup> against the UniProt database<sup>2</sup> in search of homologous sequences for the membrane domain of NHA2. Since over 1000 hits were found, we created several collections of homologues, consisting of the 200, 300 and 500 best hits from the third PSI-BLAST round. The sequences chosen for these collection were not fragments (defined as hits shorter than 80% the length of NHA2) or redundant sequences (<90%). After aligning the sequences using the MUSCLE algorithm,<sup>3</sup> we utilized the different MSAs to calculate evolutionary conservation scores via the ConSurf webserver (<http://consurf.tau.ac.il>),<sup>4</sup>. We then compared the scores received for the different sets to the scores computed for the initial, more limited sequence collection, consisting of only 55 sequences. Reassuringly, mapping of the scores on the model-structure of NHA2 showed generally high correspondence between the different collections, with the protein core remaining conserved in all examined sets, and the periphery of the protein variable. This indicated that our conservation analysis is

robust to the choice of homologous sequences. It is noteworthy that the five charged residues in and near the TM4-TM11 assembly, namely Glu215, Glu278, Glu279, Arg432 and Lys460, receive the highest conservation grade (9) using all the different sequence collections for computing the scores.

### ***SNPs reside in variable regions***

According to the dbSNP database,<sup>5</sup> three non-synonymous SNPs have been identified in NHA2. The polymorphisms result in the following amino acids substitutions: I159T, V161A and F357C. The model predicted that all replacements occur in residues situated in extra-cellular regions and display low evolutionary conservation. Ile159 and Val161 are located in the region preceding TM2, while Phe357 resides in the TM7-TM8 loop. Moreover, the predicted extra-cellular location might explain the fact that two of the SNPs (in positions 159 and 357) result in substitutions of hydrophobic amino acids with polar ones. Substitutions of this kind might not be tolerable in the hydrophobic TM domain, especially in lipid-exposed positions (Supplementary Fig. S3b).

## SUPPLEMENTARY FIGURE LEGENDS

**Fig. S1. Conserved hydrophilic residues in the protein core.** In all panels, evolutionarily conserved hydrophilic residues in the TM domain are shown as spheres. Panels A and C depict the protein from within the membrane, with the intra-cellular side below. Panels B and D provide a top-down view of the transporter from the extra-cellular side of the membrane. **(a)-(b)** the 3D model of NHA2 is colored by hydrophobicity according the scale of Kessel and Ben-Tal<sup>6</sup> with blue-through-yellow corresponding to hydrophilic-through-hydrophobic. **(c)-(d)** The model-structure is colored by conservation scores, using the color-coding bar, with turquoise-through-maroon indicating variable-through-conserved. It is apparent that most of the conserved hydrophilic residues of the TM domain reside in (or in the vicinity of) the TM4-TM11 assembly, or within the external and internal funnels.

**Fig. S2. The pairwise alignment between NHA2 and NhaA utilized for building the NHA2 model-structure.** The pairwise alignment of the TM domains of NhaA and NHA2, produced using the NHA2 TM boundaries of Fig. 1. NHA2 amino acids that are identical to their corresponding residues in NhaA are highlighted in black and similar residues in grey background. The TM helices are marked by brown rectangles and roman numbers.

**Fig. S3. Model validation via the 'positive-inside' rule and SNPs.** The intra-cellular side is at the bottom. The approximate boundaries of the hydrocarbon region of the membrane, of 25Å width, are shown in grey. **(a)** The NHA2 3D-model is colored white. C $\alpha$  atoms of lysines and arginines positioned in the intra- and extra-cellular ends of NHA2 are shown as blue spheres. In correspondence with the 'positive-inside' rule,<sup>7</sup> the intra-cellular end contains 15 positively charged residues, while the extra-cellular end includes only eight. **(b)** The model-structure is colored by evolutionary conservation as in

Fig. 2 and according to the color bar below. The three known SNPs, I59, V161 and F359 are shown as spheres. The examined polymorphisms map to variable residues, located on loop regions.

**Fig. S4. Expression level of NHA2 mutants heterologously expressed in yeast strain AB11c.**

Western blot of total lysate (100  $\mu$ g) from yeast harboring NHA2 (WT), empty vector (EV) or NHA2 mutant, as indicated. Membranes were probed with anti-NHA2 and anti-actin.

**Fig. S5. NHA2 mutants localize correctly to the plasma membrane.** Fluorescence images were taken from overnight grown AB11c yeasts expressing GFP-NHA2 (WT) or its mutant as indicated.

**Fig. S6. Functional analysis of additional NHA2 mutants: dosage response.** The salt-sensitive yeast strain AB11C was transformed with His-tagged NHA2 (WT), NHA2 mutant as indicated, or empty vector (EV). Yeasts were grown in APG medium<sup>8</sup> supplemented with LiCl (Left panels), or NaCl (Right panels), and growth was determined by optical density of the culture at 600 nm (OD600) after 24 hrs (LiCl) or 48 hrs (NaCl) at 30° C. Data are the average of triplicate determinations. All mutants were with His tag except mutants in panel B, where NHA2 and its mutants E381C, K382C, E384C, E386C and K387C were tagged with a version of GFP with potential use of pH measurements.

**Fig. S7. Functional analysis of additional NHA2 mutants: pH profile.** Same as Supplemental Fig. S6 except that LiCl concentration was fixed at 25 mM and NaCl concentration at 300 mM. Media pH was adjusted by using phosphoric acid.

# SUPPLEMENTARY FIGURES

Fig. S1

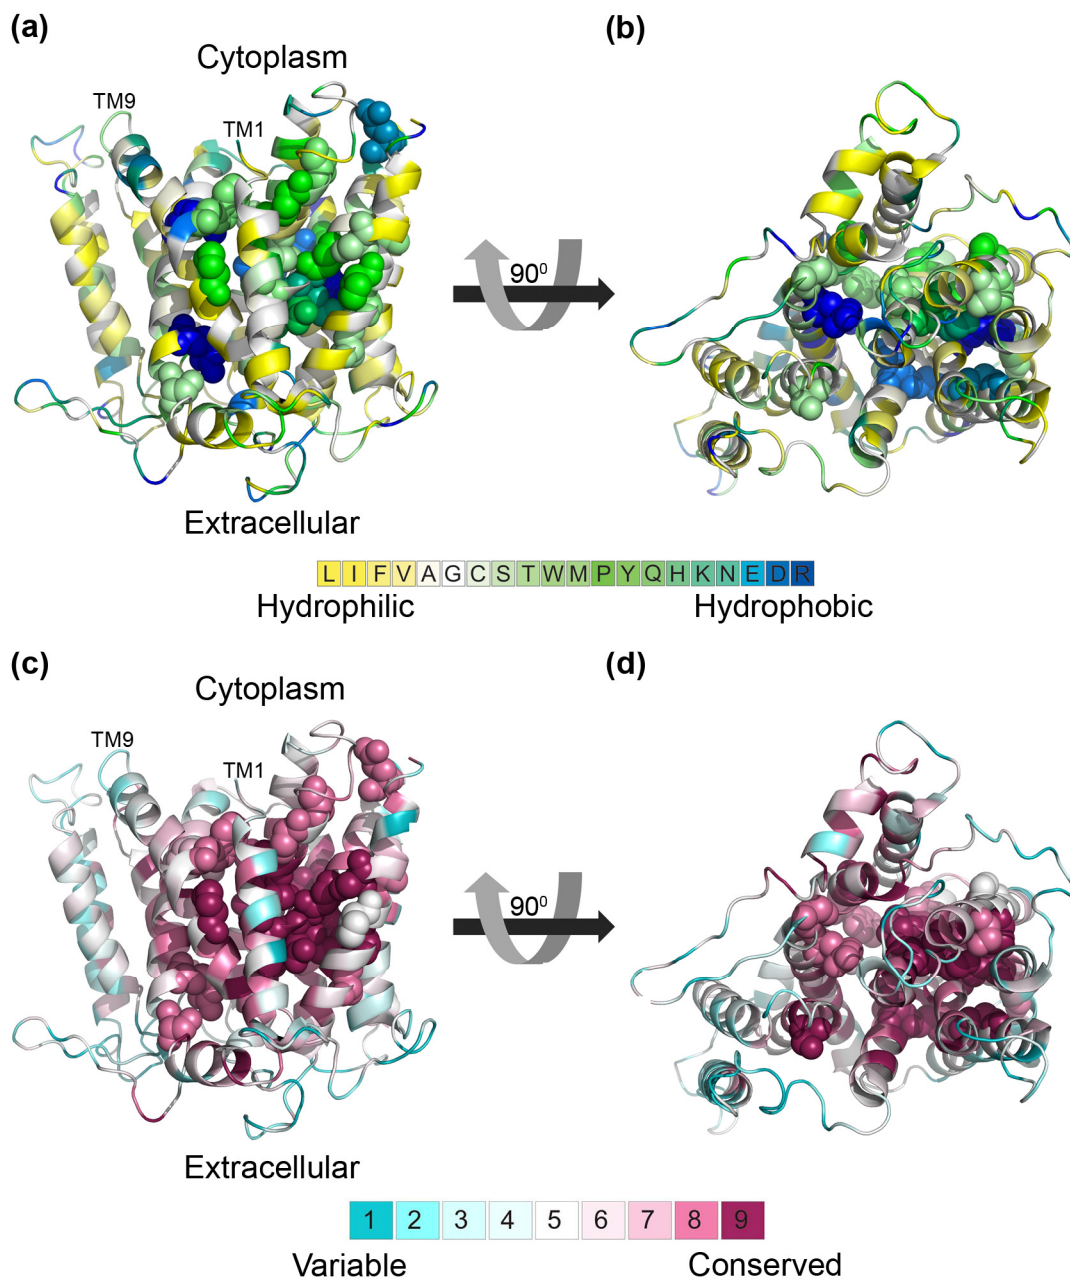

Fig. S2

|             |                                                      |      |  |     |
|-------------|------------------------------------------------------|------|--|-----|
|             |                                                      | I    |  |     |
| <b>NhaA</b> | SSDASGGIILIIAATLAMIMAN-----SGATSGWYHDFLET---PVQL     |      |  |     |
| <b>NHA2</b> | NL-FGIIILFYCAIIGGKLLGLIKLPTLPPLPSLLGMLLAGFLIRNIPVI   |      |  |     |
|             |                                                      | II   |  | III |
| <b>NhaA</b> | RVGSLEINKNMLLWINDALMAVFFLLVGLVVKRELMQGLASLRQAAPFV    |      |  |     |
| <b>NHA2</b> | NDNVQIKHK-WSSSLRSIALSIILVRAAGLGLDSKALK-----KLKGVCV   |      |  |     |
|             |                                                      | III  |  | IV  |
| <b>NhaA</b> | IAAIIGMIVPALLYLAFN-----YADFITREGWAI PAATDIAFALGVLAL  |      |  |     |
| <b>NHA2</b> | RLSMGPCIVEACTSALLAHYLLGLPWQWGFILGFVLGAVSPA VVVPSMLL  |      |  |     |
|             |                                                      | V    |  |     |
| <b>NhaA</b> | L---GSRVPLALKIFLMALAIIDDLGATIIIALFY----TNDLS-----    |      |  |     |
| <b>NHA2</b> | LQGGGYGVEKGVPTLLMAAGSFDDLLAITGFNTCLGIAFSTGSTVFNVLR   |      |  |     |
|             |                                                      | VI   |  | VII |
| <b>NhaA</b> | -MASLGVAAVAIAVLAVLNLC-----GARRTGVYILVGVVLTAVL        |      |  |     |
| <b>NHA2</b> | GVLEVVIIGVATGSVLGFFIQYFPSRDQDKLVCKRTFLVLGLSVLAVFSSV  |      |  |     |
|             |                                                      | VIII |  | IX  |
| <b>NhaA</b> | --KSGVHATLAGVIVGFFIPLKEKHGRSPAKRLEHVLHPWVAYLILPLFA   |      |  |     |
| <b>NHA2</b> | HFGFPGSGGLCTLVMAFLAGMGWT----SEKAEVEKLI IAWAWDIFQPLLF |      |  |     |
|             |                                                      | X    |  |     |
| <b>NhaA</b> | FANAGVSLQGVTLDGLTSLPLGIIAGLLIGKPLGISLFCWLALRLKLAH    |      |  |     |
| <b>NHA2</b> | GLI GAEVSIASLRPETVGLC-VATVGI AVLIRILTTFLMVCFA-----   |      |  |     |
|             |                                                      | XI   |  | XII |
| <b>NhaA</b> | LPEGTTYQQIMVVGILCGIGFTMSIFIASLAFGSVDPE-----L         |      |  |     |
| <b>NHA2</b> | ---GFNLKEKIFISFAWLPKATVQAATGSVALDTARSHGKQLEDYGM DV   |      |  |     |
|             |                                                      | XII  |  |     |
| <b>NhaA</b> | INWAKLGLVGSISSAVIGYSWLRVRL                           |      |  |     |
| <b>NHA2</b> | LTVAFLSILITAPIGSLIIGLLGPRL-                          |      |  |     |

Fig. S3

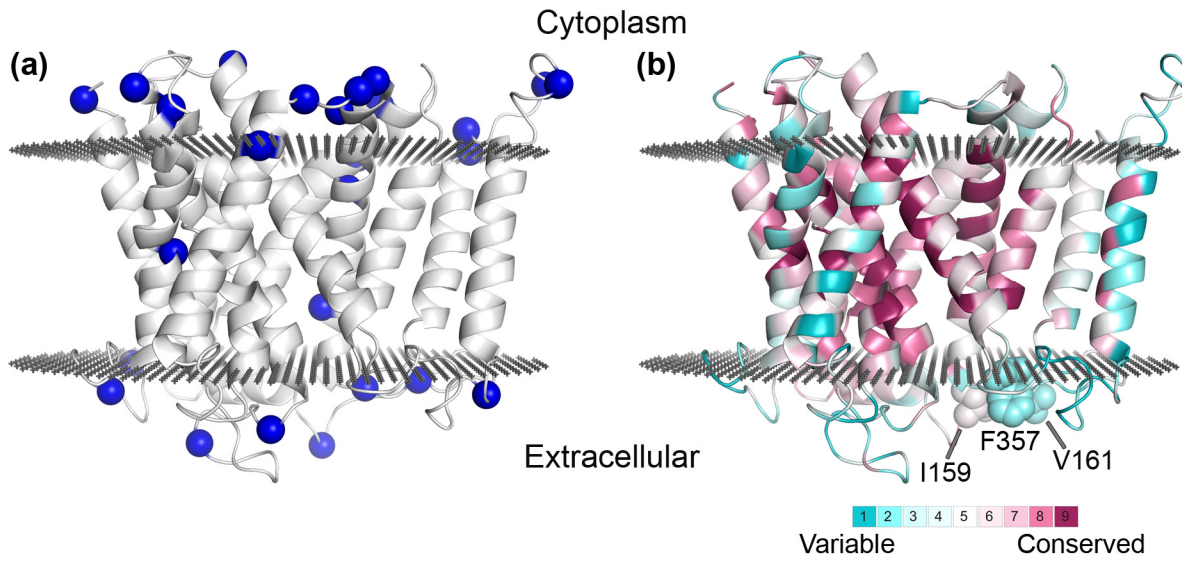



**Fig. S4**

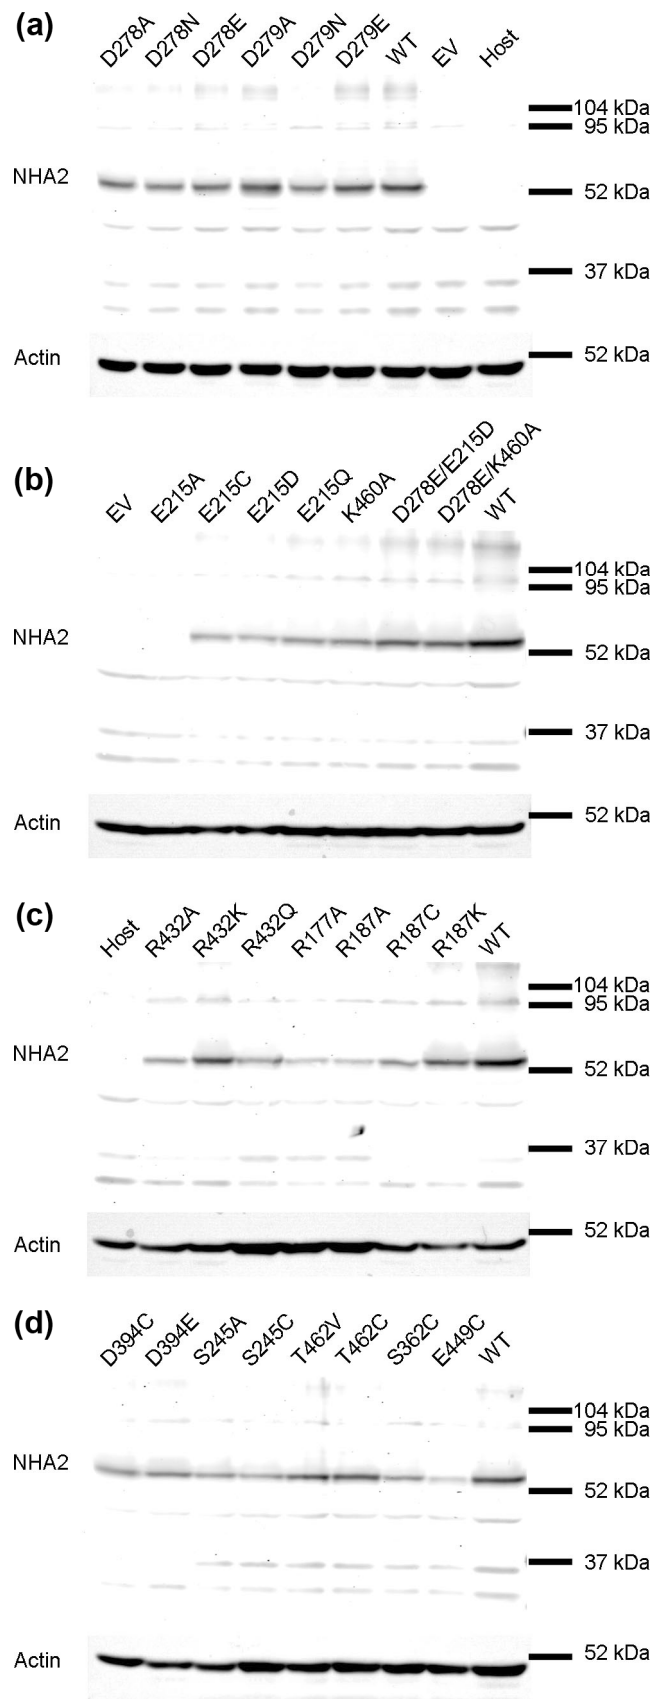

**Fig. S5**

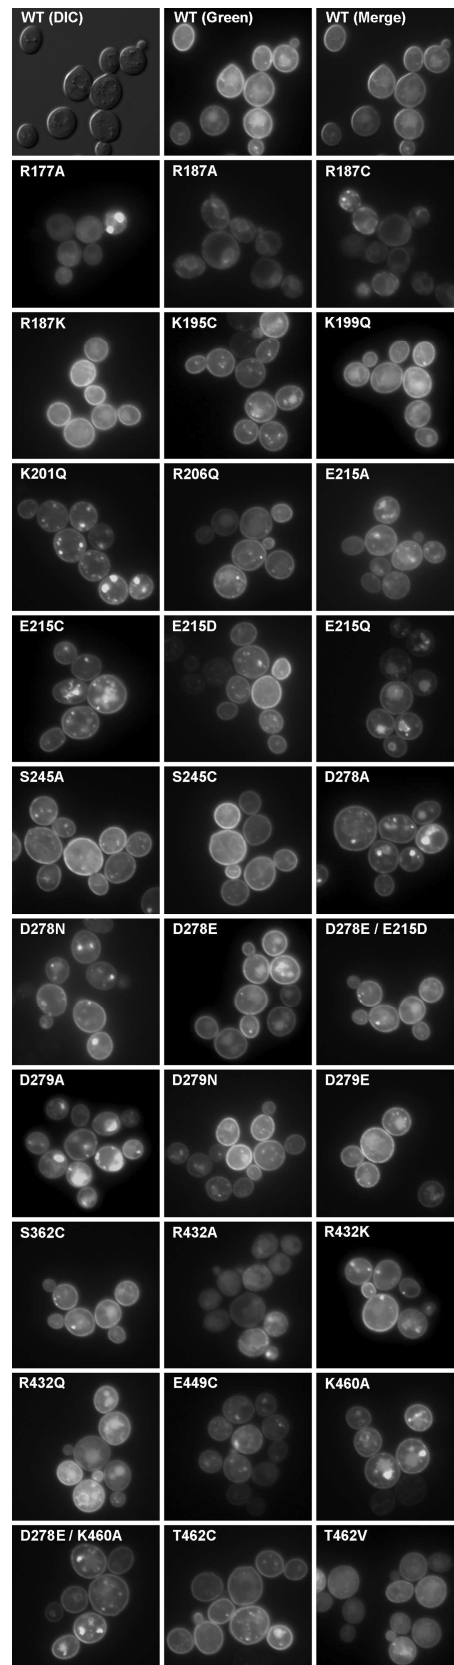

Fig. S6

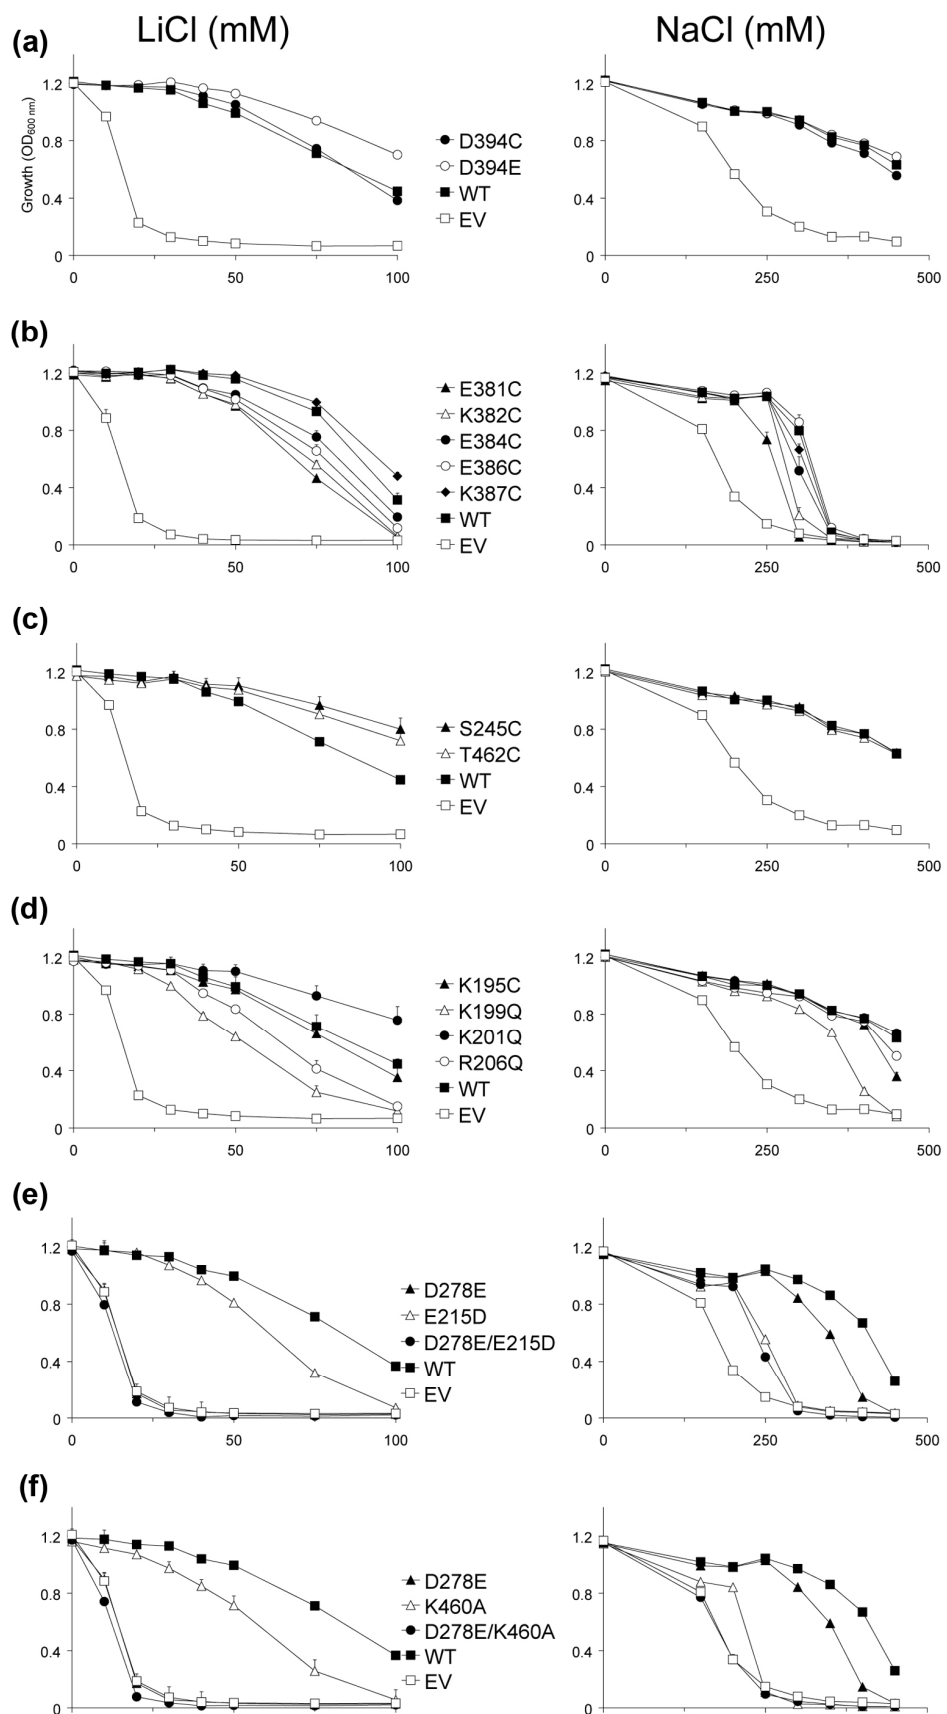

Fig. S7

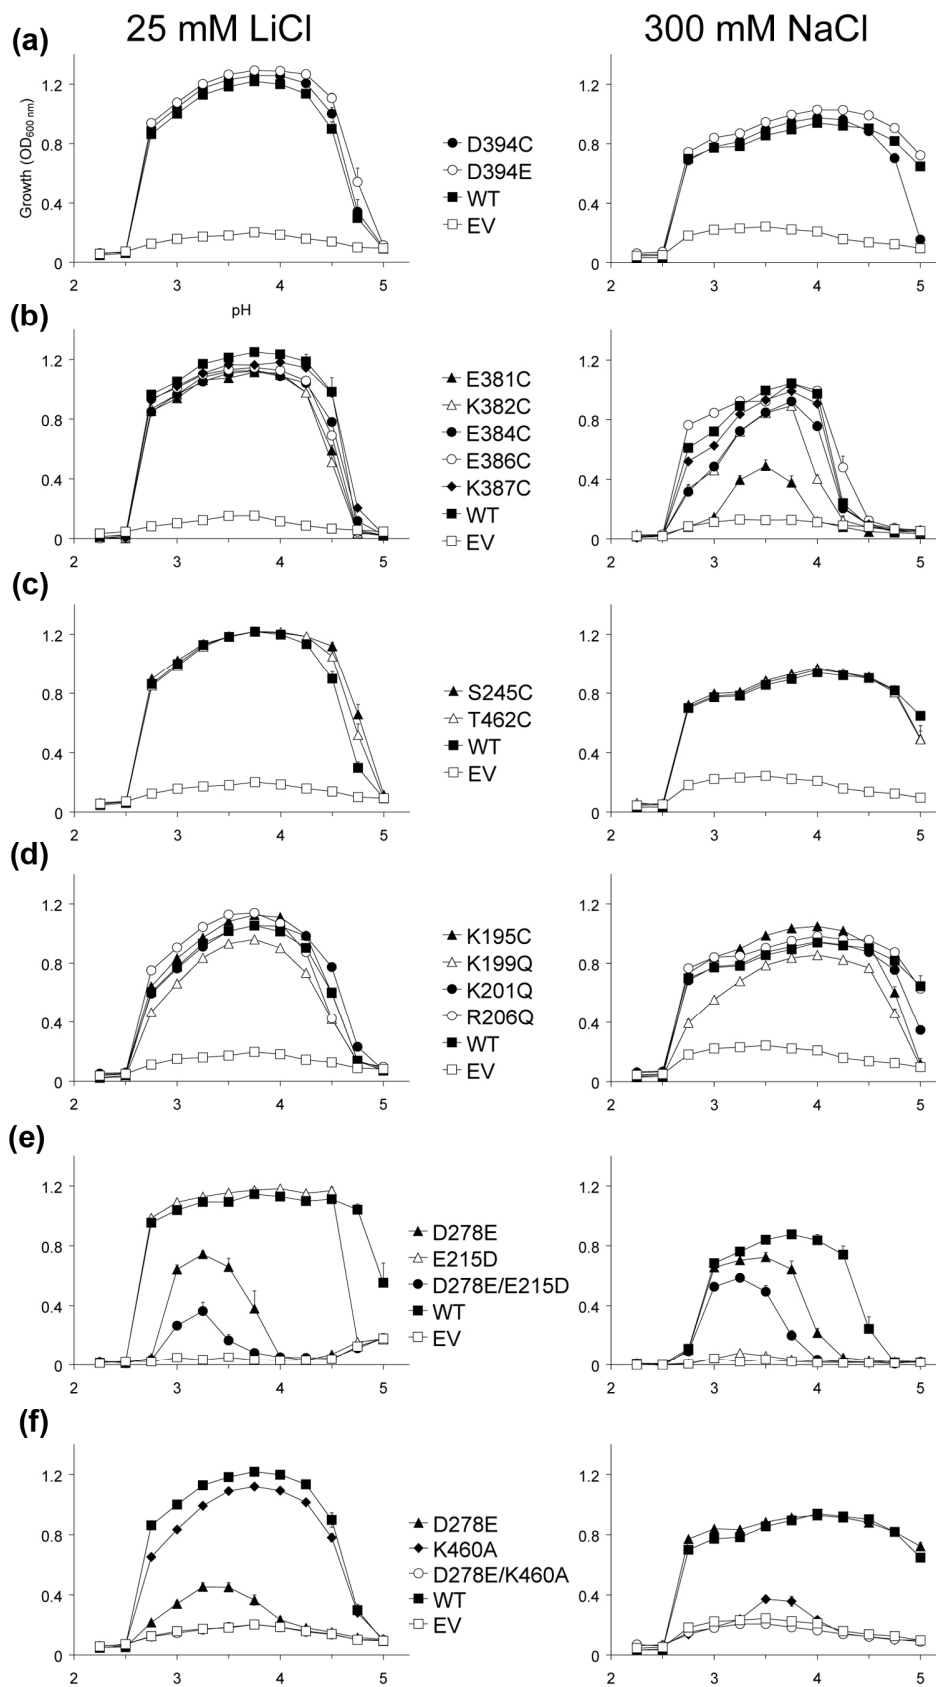

## References

1. Altschul, S. F., Madden, T. L., Schaffer, A. A., Zhang, J., Zhang, Z., Miller, W. & Lipman, D. J. (1997). Gapped BLAST and PSI-BLAST: a new generation of protein database search programs. *Nucleic Acids Res* **25**, pp. 3389-3402.
2. Bairoch, A., Apweiler, R., Wu, C. H., Barker, W. C., Boeckmann, B., Ferro, S., Gasteiger, E., Huang, H., Lopez, R., Magrane, M., Martin, M. J., Natale, D. A., O'Donovan, C., Redaschi, N. & Yeh, L. S. (2005). The Universal Protein Resource (UniProt). *Nucleic Acids Res* **33**, pp. D154-159.
3. Edgar, R. C. (2004). MUSCLE: a multiple sequence alignment method with reduced time and space complexity. *BMC Bioinformatics* **5**, pp. 113.
4. Landau, M., Mayrose, I., Rosenberg, Y., Glaser, F., Martz, E., Pupko, T. & Ben-Tal, N. (2005). ConSurf 2005: the projection of evolutionary conservation scores of residues on protein structures. *Nucleic Acids Res* **33**, pp. W299-302.
5. Sherry, S. T., Ward, M. H., Kholodov, M., Baker, J., Phan, L., Smigielski, E. M. & Sirotkin, K. (2001). dbSNP: the NCBI database of genetic variation. *Nucleic Acids Res* **29**, pp. 308-311.
6. Kessel, A. & Ben-Tal, N. (2002). Free energy determinants of peptide association with lipid bilayers. In *Current Topics in Membranes 52* (Simon S.A. & McIntosh T. J.), pp. 205-253, Academic Press, San Diego.
7. Heijne, G. V. (1986). The distribution of positively charged residues in bacterial inner membrane proteins correlates with the trans-membrane topology. *EMBO J* **5**, pp. 3021-3027.
8. Rodriguez-Navarro, A. & Ramos, J. (1984). Dual system for potassium transport in *Saccharomyces cerevisiae*. *J Bacteriol.* **159**, pp. 940-945.
